# Supplementary material for: Tuning the defects in MoS2/reduced graphene oxide 2D hybrid materials for optimizing battery performance
Source: Royal Society of Chemistry journal article supplement (doi:10.1039/d1se00729g), 2021-01-01
Supplement: d1se00729g1.pdf [file d1se00729g1.pdf]

## **Supporting Information**

### **Tuning Defects in the MoS<sub>2</sub>/Reduced Graphene Oxide 2D Hybrid Materials for Optimizing Battery Performance**

Kamalambika Muthukumar, Levon Leban II, Archana Sekar, Ayyappan Elangovan, Nandini  
Sarkar, and Jun Li\*

Department of Chemistry, Kansas State University, Manhattan, Kansas, 66506, USA.

**Figure S1.** The full scale and expanded region of Raman spectra of (a, b) MoS<sub>2</sub>/rGO-325, (c, d) MoS<sub>2</sub>/rGO-250 and (e, f) MoS<sub>3</sub>/rGO intermediate product.

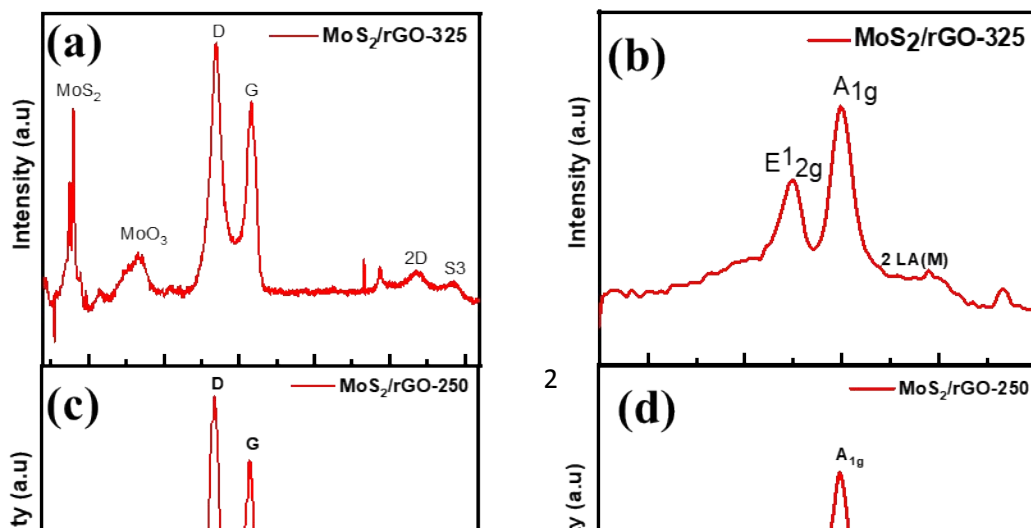

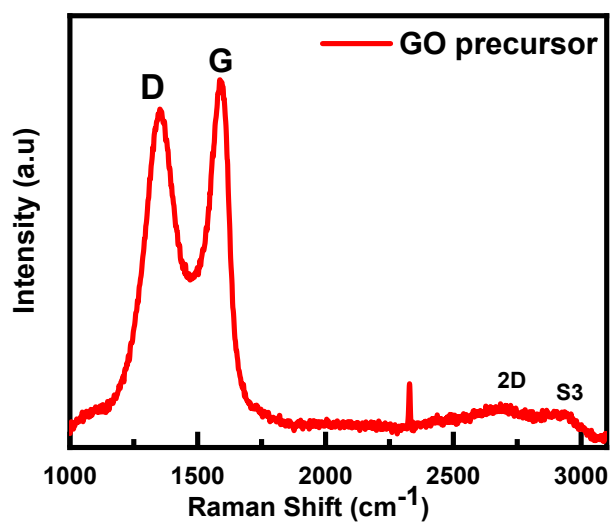

**Figure S2.** Raman Spectra of graphene oxide (GO) precursor material.

**Figure S1.** The full scale and expanded region of Raman Spectra of (a, b) MoS<sub>2</sub>/rGO-600, (c, d) MoS<sub>2</sub>/rGO-325 and (e, f) MoS<sub>3</sub>/rGO intermediate product.

**Table S1.** Raman Analysis of GO precursor and MoS<sub>2</sub>/rGO hybrids

| Sample                             | I <sub>D</sub> /I <sub>G</sub> | I <sub>S3</sub> /I <sub>2D</sub> |
|------------------------------------|--------------------------------|----------------------------------|
| GO Precursor                       | 0.9                            | 1.7                              |
| MoS <sub>3</sub> /rGO-intermediate | 1.3                            | 0.3                              |
| MoS <sub>2</sub> /rGO-250          | 1.3                            | 0.3                              |
| MoS <sub>2</sub> /rGO-325          | 1.3                            | 0.4                              |
| MoS <sub>2</sub> /rGO-600          | 1.3      3                     | 0.4                              |

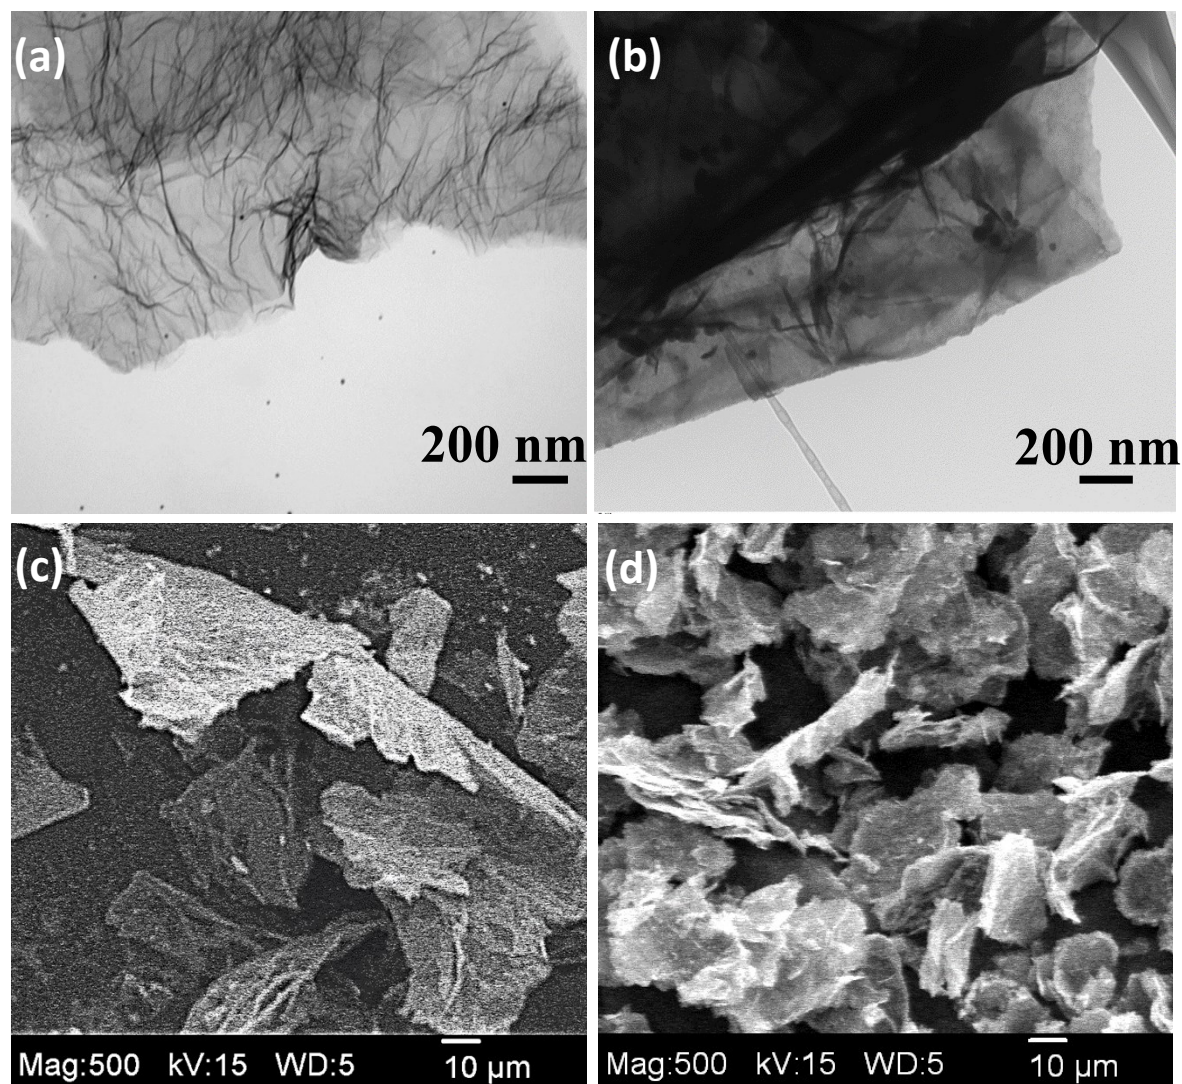

**Figure S3.** TEM images of (a) bare rGO nanosheets and (b) the MoS<sub>3</sub>/rGO intermediate. (c) and (d): SEM images of these two samples, respectively. The bare rGO sample was prepared with microwave irradiation in absence of ATM precursors before subjected to thermal annealing at 600 °C in 3% H<sub>2</sub> and 97% Ar. The MoS<sub>3</sub>/rGO intermediate was obtained after the microwave irradiation in presence of ATM precursors but was not subjected to the thermal annealing.

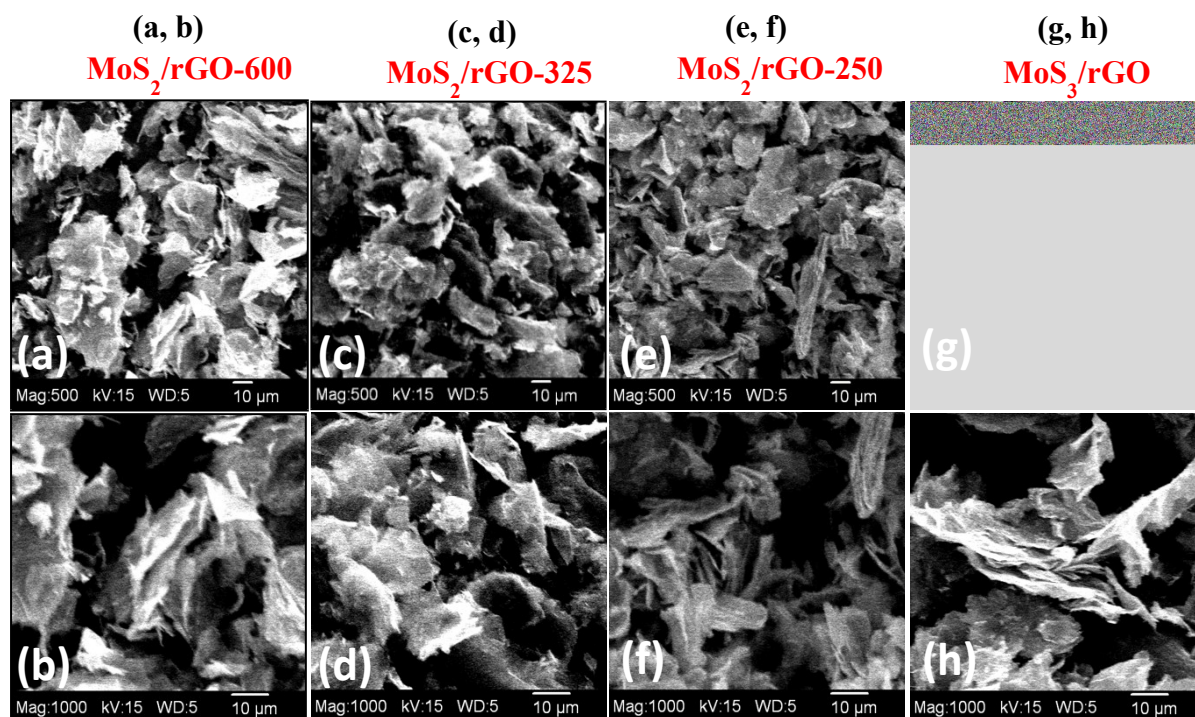

**Figure S4.** Low- and higher-magnification FESEM images of (a, b) MoS<sub>2</sub>/rGO-600, (c, d) MoS<sub>2</sub>/rGO-325, (e, f) MoS<sub>2</sub>/rGO-250, and (g, h) MoS<sub>3</sub>/rGO-intermediate.

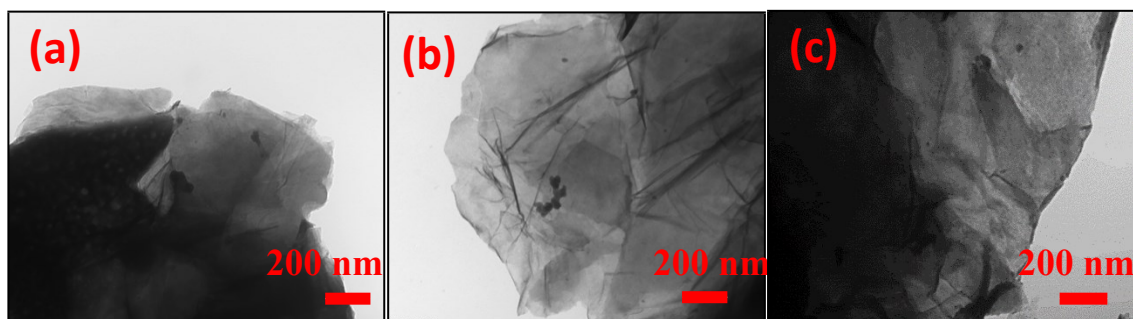

**Figure S5.** TEM images of (a) MoS<sub>2</sub>/rGO-250, (b) MoS<sub>2</sub>/rGO-325, and (c) MoS<sub>2</sub>/rGO-600.



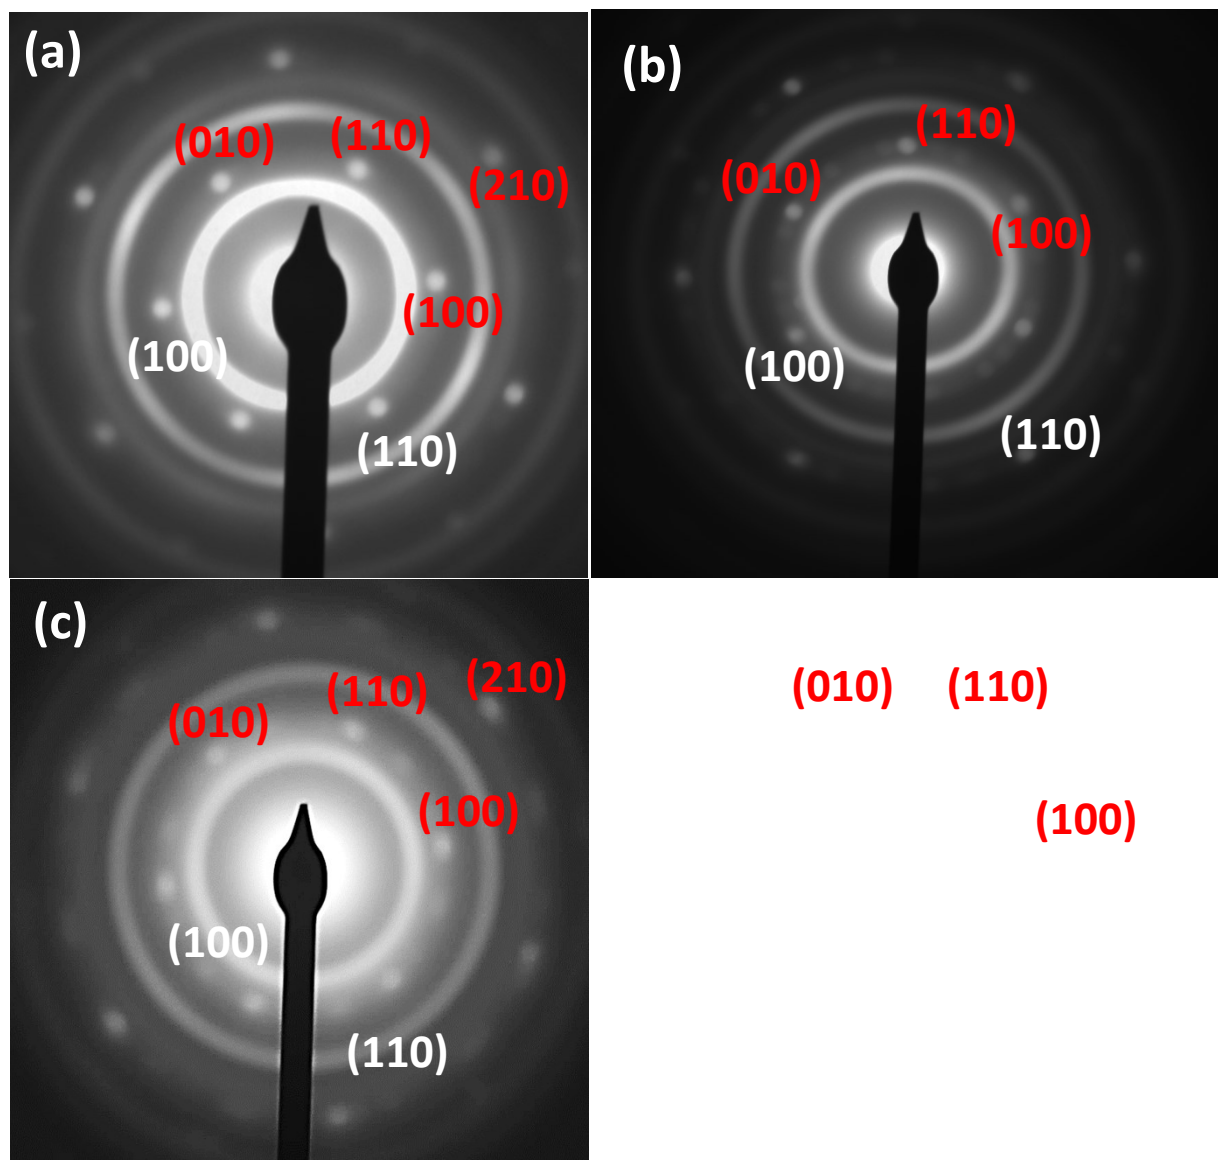

**Figure S6.** SAED patterns of (a) MoS<sub>2</sub>/rGO-600, (b) MoS<sub>2</sub>/rGO-325, (c) MoS<sub>2</sub>/rGO-250, and (d) MoS<sub>3</sub>/rGO intermediate. The red-colored indices at the top indicate the isolated 2D electron diffraction spots with the six-fold symmetry from the rGO nanosheets, while the white indices at the bottom indicate the continuous rings of 2D powder electron diffraction from MoS<sub>2</sub> nanopatches with random rotational orientations in the rGO plane.

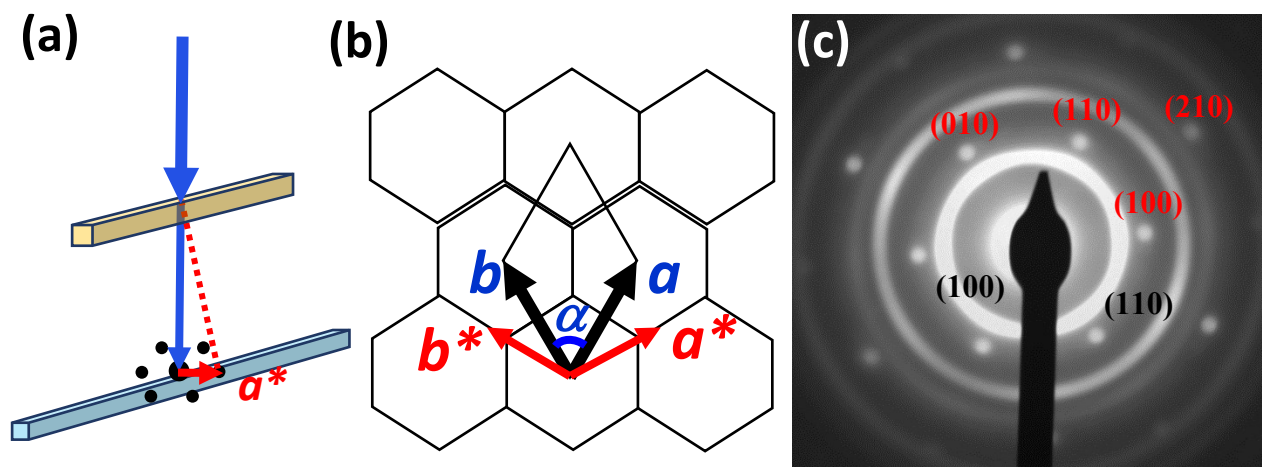

(d)

- **For 2D crystals with a hexagonal lattice:**  
 $a = b, \alpha = 60^\circ$   
 $a$  - real space lattice;  $a^*$  - reciprocal space lattice  
 $a \cdot a^* = 2\pi$  i.e.  $a \times a^* \times \cos 30^\circ = 2\pi$   
 $a^* = 2\pi / (a \times \cos 30^\circ)$  or  $a = 2\pi / (a^* \times \cos 30^\circ)$
- **For isolated SAED spots from rGO:**  
rGO:  $a = 2.46 \text{ \AA} \Rightarrow a^* = 2.948 \text{ \AA}^{-1}$
- **Use  $a^*$  of rGO to calibrate the  $a^*$  of the continuous rings from  $\text{MoS}_2$ :**  
(100) ring of  $\text{MoS}_2$ :  $a^* = 2.29 \text{ \AA}^{-1} \Rightarrow a = 3.17 \text{ \AA}$

**Figure S7.** (a) Schematic illustration of the SAED with the electron beam perpendicular to the 2D crystal plane. (b) The relationship of the real space 2D hexagonal lattice  $a$  and  $b$  and the reciprocal diffraction lattice ( $a^*$  and  $b^*$ ). (c) The SAED pattern of  $\text{MoS}_2/\text{rGO-600}$ . (d) The procedure to derive the  $\text{MoS}_2$  lattice in reference to the sharp hexagonal SAED pattern of the 2D monocrystalline rGO nanosheets.



**Table S2.** The parameters derived from deconvolution of Mo 3d and S 2p XPS spectra.

|                              |                   | MoS <sub>3</sub> /rGO intermediate |                              | MoS <sub>2</sub> /rGO-250 |                              | MoS <sub>2</sub> /rGO-325                      |                              | MoS <sub>2</sub> /rGO-600                      |                              |
|------------------------------|-------------------|------------------------------------|------------------------------|---------------------------|------------------------------|------------------------------------------------|------------------------------|------------------------------------------------|------------------------------|
|                              |                   | B.E. (eV)                          | Atomic % in the same element | B.E. (eV)                 | Atomic % in the same element | B.E. (eV)                                      | Atomic % in the same element | B.E. (eV)                                      | Atomic % in the same element |
| Mo <sup>4+</sup>             | 3d <sub>5/2</sub> | 229.08                             | 28.58                        | 229.03                    | 83.08                        | 229.12                                         | 66.41                        | 229.28                                         | 68.24                        |
|                              | 3d <sub>3/2</sub> | 232.21                             |                              | 232.16                    |                              | 232.25                                         |                              | 232.41                                         |                              |
| Mo <sup>5+</sup>             | 3d <sub>5/2</sub> | 229.32                             | 19.39                        | 230.52                    | 9.44                         | Mo <sup>5+</sup> is not present in this sample |                              | Mo <sup>5+</sup> is not present in this sample |                              |
|                              | 3d <sub>3/2</sub> | 232.45                             |                              | 233.65                    |                              |                                                |                              |                                                |                              |
| Mo <sup>6+</sup>             | 3d <sub>5/2</sub> | 232.11                             | 52.03                        | 232.68                    | 7.48                         | 231.90                                         | 33.58                        | 232.18                                         | 31.75                        |
|                              | 3d <sub>3/2</sub> | 235.24                             |                              | 235.81                    |                              | 235.03                                         |                              | 235.31                                         |                              |
| S <sup>2-</sup>              | 2p <sub>3/2</sub> | 162.59                             | 45.99                        | 161.68                    | 46.46                        | 161.93                                         | 86.50                        | 162.09                                         | 100                          |
|                              | 2p <sub>1/2</sub> | 163.78                             |                              | 162.47                    |                              | 163.21                                         |                              | 163.27                                         |                              |
| S <sub>2</sub> <sup>2-</sup> | 2p <sub>3/2</sub> | 164.76                             | 54.01                        | 162.94                    | 53.54                        | 163.41                                         | 13.50                        |                                                |                              |
|                              | 2p <sub>1/2</sub> | 165.79                             |                              | 164.10                    |                              | 164.58                                         |                              |                                                |                              |
| Mo : S                       |                   | 1:2.4                              |                              | 1:2.9                     |                              | 1:2.3                                          |                              | 1:1.9                                          |                              |

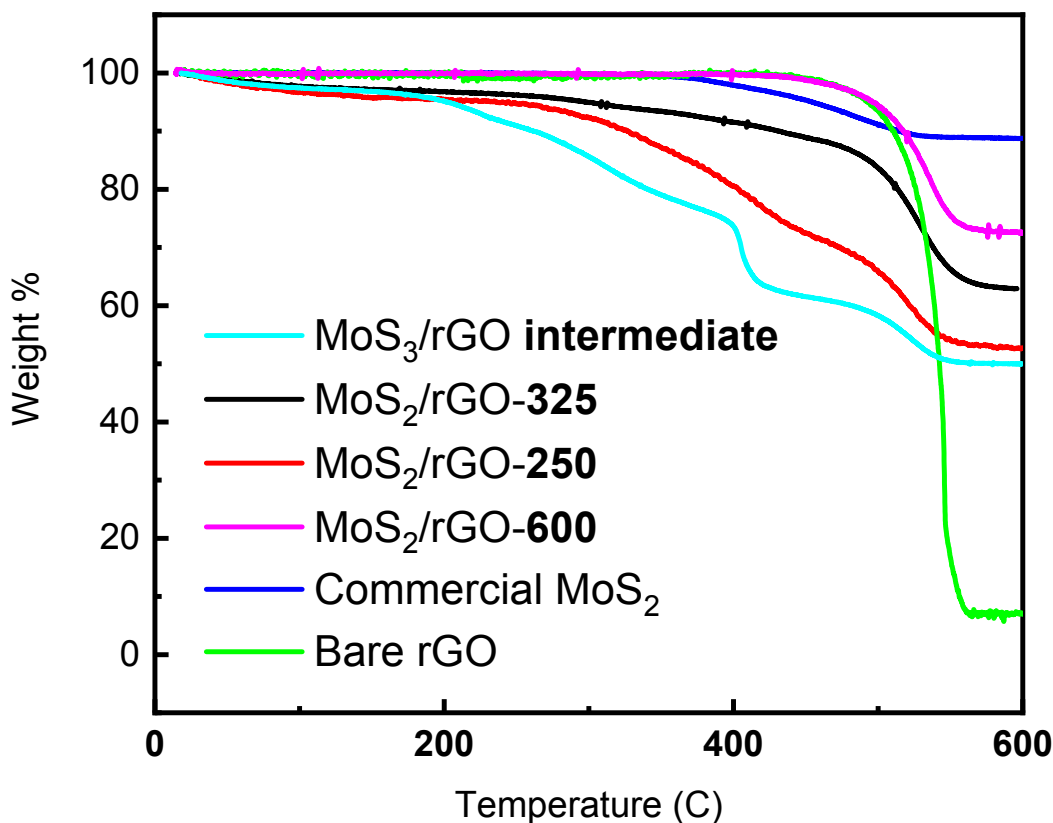

**Figure S8.** Thermogravimetric analyses of various hybrid materials and control samples (commercial  $\text{MoS}_2$  powder and bare rGO synthesized at the same conditions as  $\text{MoS}_2/\text{rGO-600}$  but without presence of ATM precursors).

**Determination of weight % of  $\text{MoS}_2$  in  $\text{MoS}_2/\text{rGO-600}$ :**

1. Bulk  $\text{MoS}_2$  shows gradual weight loss of 10.1% from 370 °C to 600°C due to the conversion of  $\text{MoS}_2$  to  $\text{MoO}_3$ .
2. Control rGO shows a steep weight loss of 93.36% at 420 °C due to the conversion of rGO to graphitic carbon.
3. Based on the above-mentioned weight loss of control samples
4. Weight loss from 370 °C till 600 °C = Weight loss of  $\text{MoS}_2$  + Weight loss of rGO  

$$= (\text{Weight\% of } \text{MoS}_2) * 10.1\% + (1 - \text{Weight\% of } \text{MoS}_2) * 93.36\%$$
5. Weight% of rGO =  $1 - \text{Weight\% of } \text{MoS}_2$
6.  $(99.91\% - 72.57\%) = (\text{Weight \% of } \text{MoS}_2) * 10.1\% + (1 - \text{Weight \% of } \text{MoS}_2) * 93.36\%$
7. Weight % of  $\text{MoS}_2$  in  $\text{MoS}_2/\text{rGO-600}$  = 79.29%

**Table S3:** Elemental Analysis of MoS<sub>x</sub>/rGO samples

| Samples                            | wt% of N | wt% of C | wt% of H | wt% of O | wt% of S | wt% of Mo <sup>a</sup> | wt% of MoS <sub>x</sub> <sup>b</sup> | wt% of rGO <sup>c</sup> | at% of Mo <sup>d</sup> | at% of S <sup>d</sup> | Mo:S <sup>e</sup> |
|------------------------------------|----------|----------|----------|----------|----------|------------------------|--------------------------------------|-------------------------|------------------------|-----------------------|-------------------|
| MoS <sub>2</sub> /rGO-600          | 0.30     | 19.98    | 0.15     | 1.17     | 33.52    | 44.88                  | 78.40                                | 21.15                   | 13.51                  | 30.69                 | 1:2.3             |
| MoS <sub>2</sub> /rGO-325          | 0.62     | 22.46    | 0.31     | 4.62     | 31.17    | 40.82                  | 71.99                                | 27.08                   | 9.58                   | 21.60                 | 1:2.3             |
| MoS <sub>2</sub> /rGO-250          | 1.07     | 18.62    | 0.31     | 5.14     | 38.56    | 36.30                  | 74.86                                | 23.76                   | 9.90                   | 31.25                 | 1:3.2             |
| MoS <sub>3</sub> /rGO-intermediate | 1.82     | 20.31    | 0.99     | 11.07    | 35.38    | 30.43                  | 65.81                                | 31.38                   | 6.50                   | 22.36                 | 1:3.4             |

**Note:**

**Elements:** N - Nitrogen; C - Carbon; H - Hydrogen; O - Oxygen; S - Sulfur; Mo - Molybdenum.

<sup>a</sup> Weight percentage of Mo = 100 % - (wt% of C + wt% of N + wt% of H + wt% of O + wt% of S)

<sup>b</sup> Weight percentage of MoS<sub>x</sub> = wt% of Mo + wt% of S

<sup>c</sup> Weight percentage of rGO = wt% of C + wt% of O

$$^d \text{ at\% of } x = \frac{\text{wt\% of } x / \text{AW of } X}{\sum_{i=1}^n (\text{wt\% of } i / \text{AW of } i)}, \text{ AW} = \text{atomic weight}$$

$$^e \text{ Atomic ratio of Mo:S} = \frac{\text{at\% of Mo}}{\text{at\% of S}}$$

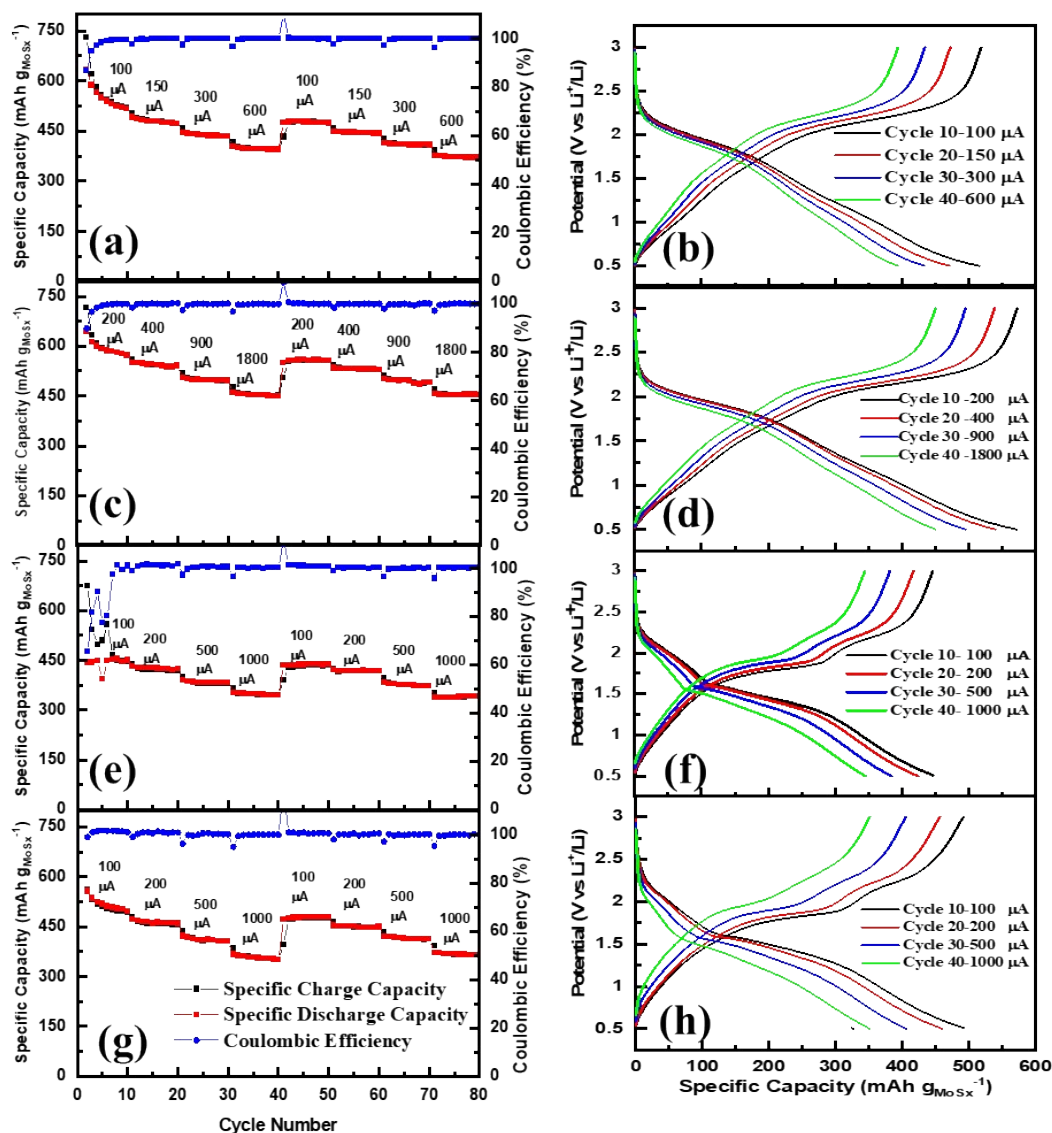

**Figure S9.** Rate Performance at varied current rates and representative galvanostatic charge/discharge curves of Li-ion half cells with the cathode made of (a, b) MoS<sub>2</sub>/rGO-600 (0.88 mg), (c, d) MoS<sub>2</sub>/rGO-325 (1.44 mg), (e, f) MoS<sub>2</sub>/rGO-250 (0.82 mg) and (g, h) MoS<sub>3</sub>/rGO intermediate material (1.76 mg). Panels (a), (c) and (e) have the same legend as panel (g).

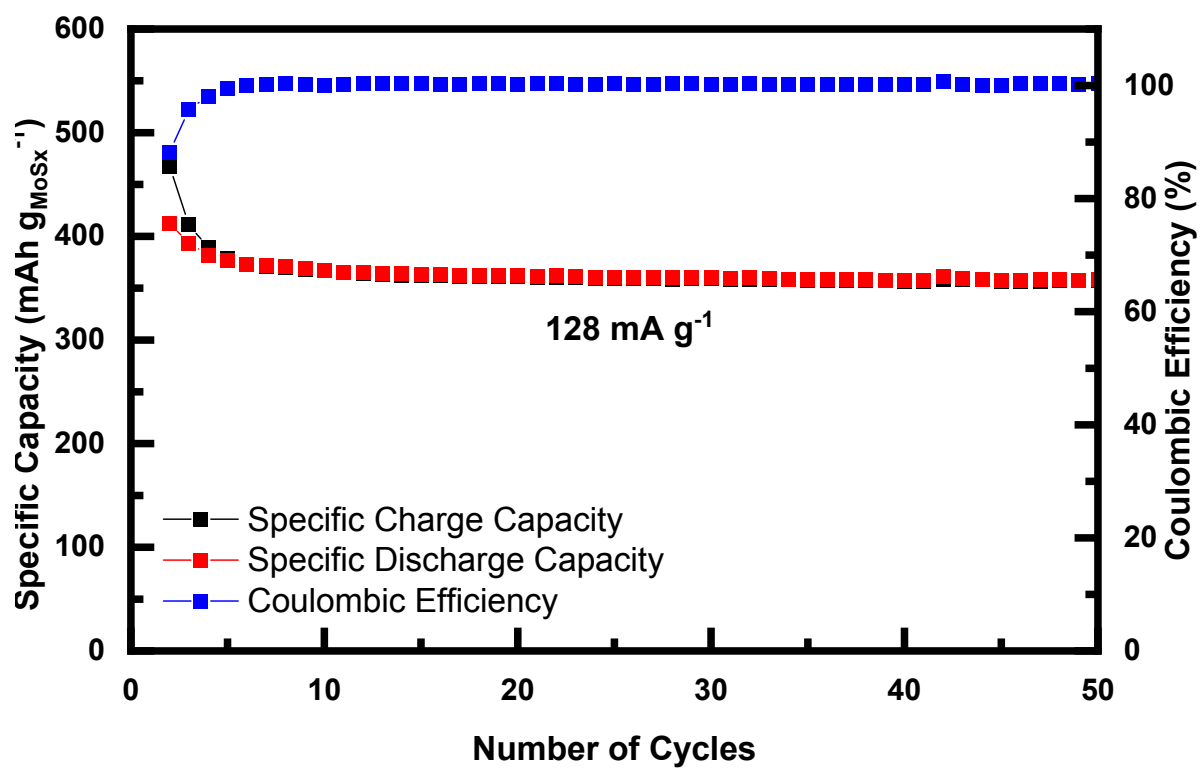

**Figure S 10.** Long term stability test of Li ion half cells with anode made of MoS<sub>2</sub>/rGO-600.

### Calculation of the Coulombic efficiency of battery tests:

$$\text{Coulombic Efficiency of MoS}_x \text{ in LIB} = \frac{\text{Specific Discharge Capacity}}{\text{Specific Charge Capacity}} * 100 \rightarrow (1)$$

### Calculation of the specific capacity of MoS<sub>x</sub>/rGO samples in battery tests:

$$\text{Specific capacity of MoS}_x = \frac{\text{measured capacity}}{\text{Total Mass of hybrid } x \text{ (wt\% of MoS}_x\text{)}} \rightarrow (2)$$

### Discussion on rGO contribution to the Li-ion storage capacity:

The small contribution from rGO can be deducted from the specific capacity. As shown in Table S3, the stabilized specific capacity at 100  $\mu\text{A}$  charge/discharge current is about 73, 86, 111 and 53  $\text{mAh g}_{\text{rGO}}^{-1}$  for the corresponding control samples rGO-600, rGO-325, rGO-250 and rGO-intermediate. After deducting these contributions based on the wt% of rGO by equations below Table S3, the specific capacity attributed to MoS<sub>x</sub> is adjusted to 499, 540, 411 and 467  $\text{mAh g}_{\text{MoS}_x}^{-1}$  for MoS<sub>2</sub>/rGO-600, MoS<sub>2</sub>/rGO-325, MoS<sub>2</sub>/rGO-250 and MoS<sub>3</sub>/rGO-intermediate, respectively. The contribution by rGO is only 3.9%, 5.7%, 8.0% and 5.1% in MoS<sub>2</sub>/rGO-600, MoS<sub>2</sub>/rGO-325, MoS<sub>2</sub>/rGO-250 and MoS<sub>3</sub>/rGO-intermediate, respectively. These small corrections are insignificant to the conclusions in the main manuscript.



**Table S4.**

| Sample                             | Specific Capacity of MoS <sub>x</sub> (mAh/g <sub>MoS<sub>x</sub></sub> ) <sup>a</sup> | Specific Capacity of rGO (mAh/g <sub>rGO</sub> ) <sup>b</sup> | (wt% of rGO / wt% of MoS <sub>x</sub> ) <sup>c</sup> | Corrected Specific Capacity <sup>d</sup> (mAh/g <sub>MoS<sub>x</sub></sub> ) | Relative Contribution of rGO <sup>e</sup> |
|------------------------------------|----------------------------------------------------------------------------------------|---------------------------------------------------------------|------------------------------------------------------|------------------------------------------------------------------------------|-------------------------------------------|
| MoS <sub>2</sub> /rGO-600          | 519                                                                                    | 73                                                            | 0.27                                                 | 499                                                                          | 3.9                                       |
| MoS <sub>2</sub> /rGO-325          | 573                                                                                    | 86                                                            | 0.38                                                 | 540                                                                          | 5.7                                       |
| MoS <sub>2</sub> /rGO-250          | 446                                                                                    | 111                                                           | 0.32                                                 | 411                                                                          | 8.0                                       |
| MoS <sub>3</sub> /rGO-intermediate | 492                                                                                    | 53                                                            | 0.48                                                 | 467                                                                          | 5.1                                       |

Estimation of contribution to

the specific capacity by rGO and MoS<sub>x</sub> in LIB

**Note:**

<sup>a</sup> Based on the 10<sup>th</sup> cycle at 100 mA in Figure S8.

<sup>b</sup> Based on the 10<sup>th</sup> cycle at 100 mA in Figure S10.

<sup>c</sup> Based on the values from Table S2.

<sup>d</sup> Corrected specific capacity = (Specific capacity of MoS<sub>x</sub>) - [(Specific capacity of rGO) \* ( $\frac{\text{wt\% of rGO}}{\text{wt\% of MoS}_x}$ )]

<sup>e</sup> Relative contribution of rGO =  $\frac{\text{Specific Capacity of MoS}_x - \text{Corrected Specific capacity}}{\text{Specific Capacity of MoS}_x} * 100$

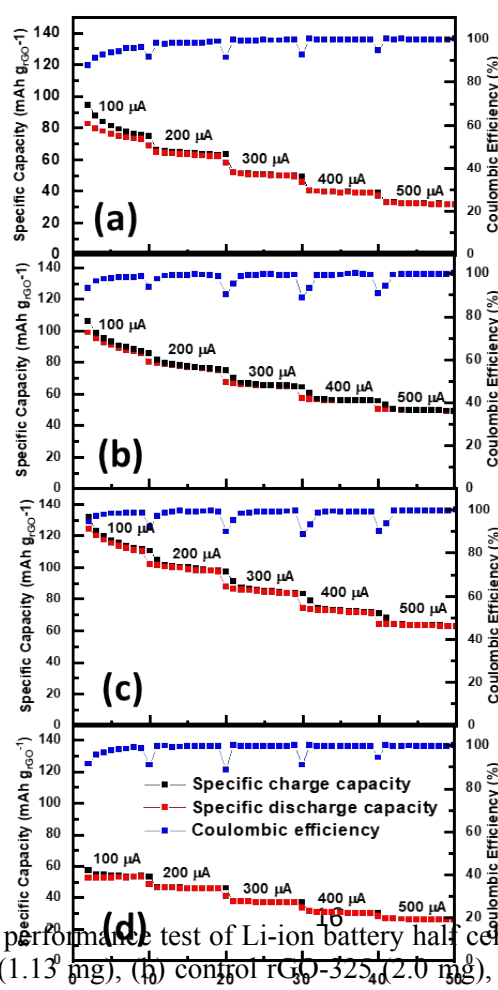

**Figure S11.** Rate performance test of Li-ion battery half cells with the cathode made of (a) control rGO-600 (1.13 mg), (b) control rGO-325 (2.0 mg), (c) control rGO-250 (1.03 mg) and (d) control rGO-intermediate (1.25 mg). Panels (a), (b) and (c) follow the same legend as panel (d).

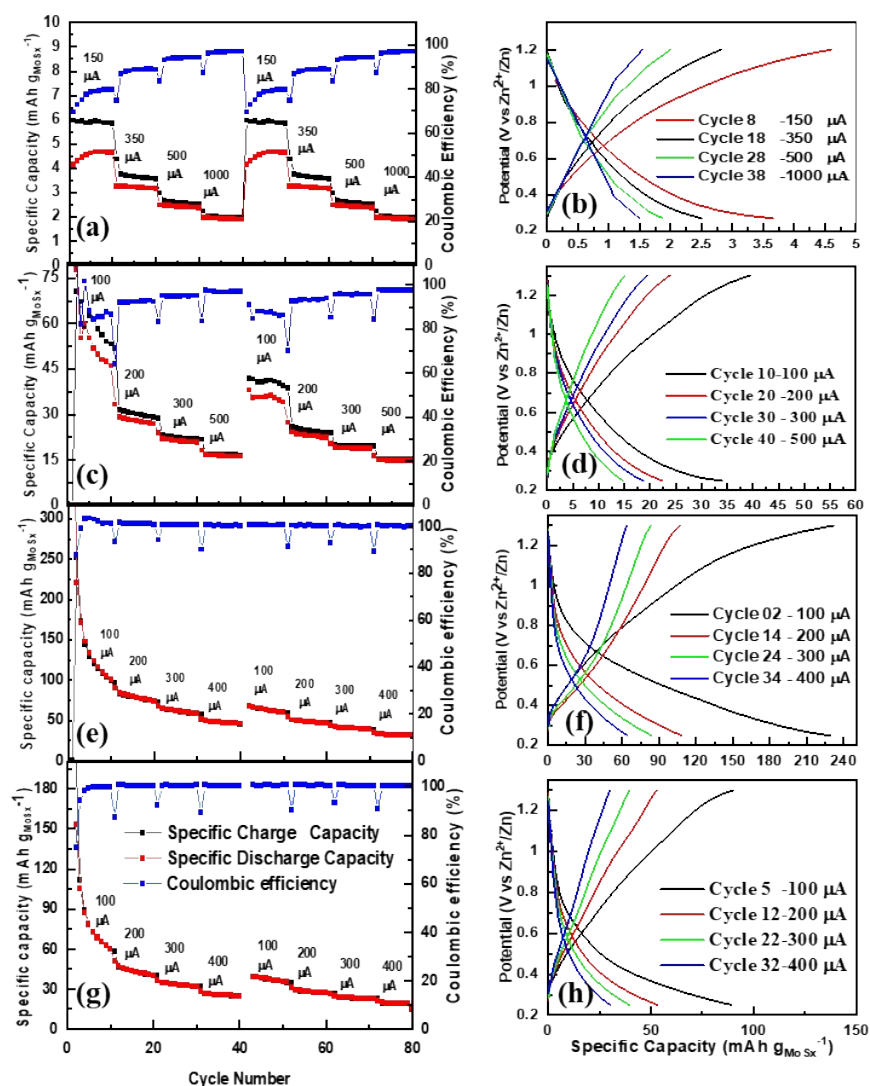

**Figure S12.** Galvanostatic charge-discharge curves and the rate performance of Zn-ion battery half-cells with the cathode made of (a, b) MoS<sub>2</sub>/rGO-600 (0.87 mg), (c, d) MoS<sub>2</sub>/rGO-325 (1.36 mg), (e, f) MoS<sub>2</sub>/rGO-250 (1.28 mg), and (g, h) MoS<sub>3</sub>/rGO intermediate hybrid material (0.88 mg). Panels (a), (c) and (e) follow same legend as panel (g).

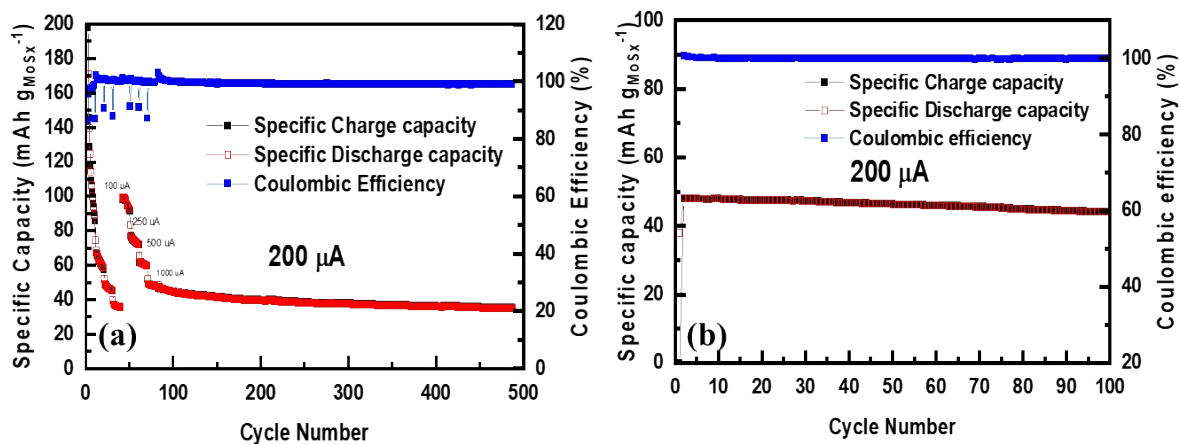

**Figure S13.** The cycle stability test of Zn-ion battery half-cells with the cathode made of (a) MoS<sub>2</sub>/rGO-250 (2.16 mg) and (b) the MoS<sub>3</sub>/rGO intermediate material (0.88 mg). The charge/discharge was carried out at 0.25 – 1.30 V vs. Zn<sup>2+</sup>/Zn.

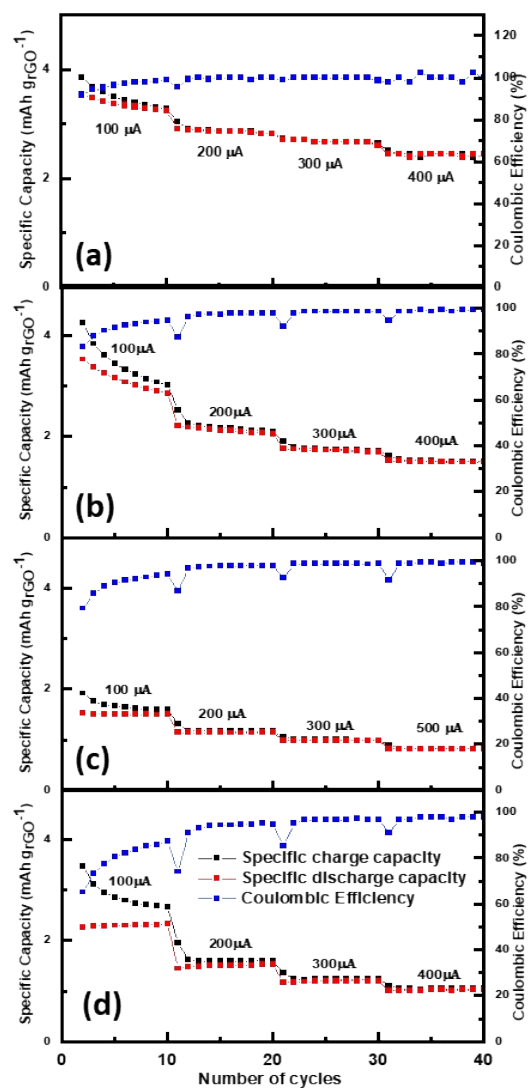

**Figure S14.** Rate performance test of Zn ion battery half cells with the cathode made of (a) control rGO-600 (1.38 mg) (b) control rGO-325 (2.0 mg) (c) control sample-250 (0.90 mg) (d) control rGO-intermediate (1.50 mg). Panels (a), (b) and (c) follow same legend as panel (d).
